# Supplementary material for: Biological Response Induced in Primary Human Gingival Fibroblasts upon Exposure to Various Types of Injectable Astringent Retraction Agents
Source: MDPI journal article supplement (doi:10.3390/ma14082081), 2021-04-20
Supplement: s1 [file s1]

---

Article

**Biological Response Induced in Primary Human Gingival Fibroblasts upon Exposure to Various Types of Injectable Astringent Retraction Agents**

**Danuta Nowakowska <sup>1</sup>, Julita Kulbacka <sup>2</sup>, Joanna Wezgowiec <sup>3,\*</sup>, Anna Szewczyk <sup>2</sup>, Dagmara Baczynska <sup>2</sup>, Marek Zietek <sup>3</sup>, Włodzimierz Wieckiewicz <sup>1</sup> and Jolanta Saczko <sup>2</sup>**

<sup>1</sup> Department of Prosthetic Dentistry, Wrocław Medical University, Wrocław 50-425, Poland; danuta.nowakowska@umed.wroc.pl (D.N.); wlodzimierz.wieckiewicz@umed.wroc.pl (W.W.)

<sup>2</sup> Department of Molecular and Cellular Biology, Wrocław Medical University, Wrocław 50-556, Poland; julita.kulbacka@umed.wroc.pl (J.K.); a.szewczyk@umed.wroc.pl (A.S.); dagmara.baczynska@umed.wroc.pl (D.B.); jolanta.saczko@umed.wroc.pl (J.S.)

<sup>3</sup> Department of Experimental Dentistry, Wrocław Medical University, Wrocław 50-425, Poland; marek.zietek@umed.wroc.pl

\* Correspondence: joanna.wezgowiec@umed.wroc.pl

**Supplementary Table S1.** Results of a post-hoc Tukey's HSD tests showing significance of differences between different types of formulation (gel, paste and foam) and the untreated control, revealed in various assays; red color denotes statistically significant differences (p-values < 0.05).

| MTT                                        | 1:10     | 5 min    |          |          | MTT                                       | 1:10     | 10 min   |          |          | MTT                                       | 1:10     | 30 min   |          |          |
|--------------------------------------------|----------|----------|----------|----------|-------------------------------------------|----------|----------|----------|----------|-------------------------------------------|----------|----------|----------|----------|
| F(3, 85)=17.770, p=0.00000                 |          |          |          |          | F(3, 84)=26.677, p=0.00000                |          |          |          |          | F(3, 76)=53.978, p=0.0000                 |          |          |          |          |
| Tukey's HSD test; MS = 146.74, df = 85.000 |          |          |          |          | Tukey's HSD test; MS = 122.50, df = 4.000 |          |          |          |          | Tukey's HSD test; MS = 183.16, df = 6.000 |          |          |          |          |
|                                            | control  | gel      | paste    | foam     |                                           | control  | gel      | paste    | foam     |                                           | control  | gel      | paste    | foam     |
| control                                    |          | 0.861889 | 0.036013 | 0.987731 | control                                   |          | 0.696372 | 0.007736 | 0.996533 | control                                   |          | 0.289465 | 0.000190 | 0.087235 |
| gel                                        | 0.861889 |          | 0.000145 | 0.948708 | gel                                       | 0.696372 |          | 0.000146 | 0.670467 | gel                                       | 0.289465 |          | 0.000148 | 0.000149 |
| paste                                      | 0.036013 | 0.000145 |          | 0.000615 | paste                                     | 0.007736 | 0.000146 |          | 0.000201 | paste                                     | 0.000190 | 0.000148 |          | 0.080633 |
| foam                                       | 0.987731 | 0.948708 | 0.000615 |          | foam                                      | 0.996533 | 0.670467 | 0.000201 |          | foam                                      | 0.087235 | 0.000149 | 0.080633 |          |

  

| MTT                                        | 1:20     | 5 min    |          |          | MTT                                        | 1:20     | 10 min   |          |          | MTT                                        | 1:20     | 30 min   |          |          |
|--------------------------------------------|----------|----------|----------|----------|--------------------------------------------|----------|----------|----------|----------|--------------------------------------------|----------|----------|----------|----------|
| F(3, 85)=15.726, p=0.00000                 |          |          |          |          | F(3, 86)=22.907, p=0.00000                 |          |          |          |          | F(3, 84)=51.392, p=0.0000                  |          |          |          |          |
| Tukey's HSD test; MS = 96.388, df = 85.000 |          |          |          |          | Tukey's HSD test; MS = 85.732, df = 86.000 |          |          |          |          | Tukey's HSD test; MS = 147.90, df = 84.000 |          |          |          |          |
|                                            | control  | gel      | paste    | foam     |                                            | control  | gel      | paste    | foam     |                                            | control  | gel      | paste    | foam     |
| control                                    |          | 0.961144 | 0.026021 | 0.899823 | control                                    |          | 0.982420 | 0.003398 | 0.190645 | control                                    |          | 0.678830 | 0.000162 | 0.245380 |
| gel                                        | 0.961144 |          | 0.000145 | 0.306897 | gel                                        | 0.982420 |          | 0.000145 | 0.002470 | gel                                        | 0.678830 |          | 0.000146 | 0.000372 |
| paste                                      | 0.026021 | 0.000145 |          | 0.035172 | paste                                      | 0.003398 | 0.000145 |          | 0.331595 | paste                                      | 0.000162 | 0.000146 |          | 0.003408 |
| foam                                       | 0.899823 | 0.306897 | 0.035172 |          | foam                                       | 0.190645 | 0.002470 | 0.331595 |          | foam                                       | 0.245380 | 0.000372 | 0.003408 |          |

  

| BrdU                                       | 1:10     | 5 min    |          |          | BrdU                                       | 1:10     | 10 min   |          |          | BrdU                                       | 1:10     | 24 h     |          |          |
|--------------------------------------------|----------|----------|----------|----------|--------------------------------------------|----------|----------|----------|----------|--------------------------------------------|----------|----------|----------|----------|
| F(3, 32)=72.655, p=0.00000                 |          |          |          |          | F(3, 139)=69.572, p=0.0000                 |          |          |          |          | F(3, 70)=74.708, p=0.0000                  |          |          |          |          |
| Tukey's HSD test; MS = 271.11, df = 32.000 |          |          |          |          | Tukey's HSD test; MS = 614.28, df = 139.00 |          |          |          |          | Tukey's HSD test; MS = 601.92, df = 70.000 |          |          |          |          |
|                                            | control  | gel      | paste    | foam     |                                            | control  | gel      | paste    | foam     |                                            | control  | gel      | paste    | foam     |
| control                                    |          | 0.999954 | 0.000165 | 0.000165 | control                                    |          | 0.977717 | 0.000008 | 0.003966 | control                                    |          | 0.709024 | 0.000156 | 0.000152 |
| gel                                        | 0.999954 |          | 0.000165 | 0.000165 | gel                                        | 0.977717 |          | 0.000008 | 0.000008 | gel                                        | 0.709024 |          | 0.000150 | 0.000150 |
| paste                                      | 0.000165 | 0.000165 |          | 0.407340 | paste                                      | 0.000008 | 0.000008 |          | 0.001996 | paste                                      | 0.000156 | 0.000150 |          | 0.461918 |
| foam                                       | 0.000165 | 0.000165 | 0.407340 |          | foam                                       | 0.003966 | 0.000008 | 0.001996 |          | foam                                       | 0.000152 | 0.000150 | 0.461918 |          |

| Griess 1:10 10 min                         |          |          |          |          | Griess 1:10 24 h                         |          |          |          |          | MTT 1:10 24 h              |          |          |          |          |
|--------------------------------------------|----------|----------|----------|----------|------------------------------------------|----------|----------|----------|----------|----------------------------|----------|----------|----------|----------|
| F(3, 74)=2.1411, p=0.10224                 |          |          |          |          | F(3, 36)=3.6336, p=0.02178               |          |          |          |          | F(3, 245)=456.16, p=0.0000 |          |          |          |          |
| Tukey's HSD test; MS = 4.3961, df = 74.000 |          |          |          |          | Tukey's HSD test; MS=1.5382, df = 36.000 |          |          |          |          | Test HSD                   |          |          |          |          |
|                                            | control  | gel      | paste    | foam     |                                          | control  | gel      | paste    | foam     |                            | control  | gel      | paste    | foam     |
| control                                    |          | 0.999092 | 0.483873 | 0.985844 | control                                  |          | 0.995641 | 0.274672 | 0.970410 | control                    |          | 0.628177 | 0.000008 | 0.000008 |
| gel                                        | 0.999092 |          | 0.101339 | 0.990776 | gel                                      | 0.995641 |          | 0.013002 | 0.852025 | gel                        | 0.628177 |          | 0.000008 | 0.000008 |
| paste                                      | 0.483873 | 0.101339 |          | 0.291148 | paste                                    | 0.274672 | 0.013002 |          | 0.575156 | paste                      | 0.000008 | 0.000008 |          | 0.654788 |
| foam                                       | 0.985844 | 0.990776 | 0.291148 |          | foam                                     | 0.970410 | 0.852025 | 0.575156 |          | foam                       | 0.000008 | 0.000008 | 0.654788 |          |

  

| SOD1 1:10 24 h                              |          |          |          |          | SOD2 1:10 24 h                              |          |          |          |          | SOD3 1:10 24 h                              |          |          |          |          |
|---------------------------------------------|----------|----------|----------|----------|---------------------------------------------|----------|----------|----------|----------|---------------------------------------------|----------|----------|----------|----------|
| F(3, 26)=20.704, p=0.00000                  |          |          |          |          | F(3, 26)=6.1116, p=0.00274                  |          |          |          |          | F(3, 26)=8.6511, p=0.00038                  |          |          |          |          |
| Tukey's HSD test; MS = 0.08437, df = 26.000 |          |          |          |          | Tukey's HSD test; MS = 0.38501, df = 26.000 |          |          |          |          | Tukey's HSD test; MS = 0.14010, df = 26.000 |          |          |          |          |
|                                             | control  | gel      | paste    | foam     |                                             | control  | gel      | paste    | foam     |                                             | control  | gel      | paste    | foam     |
| control                                     |          | 0.000169 | 0.001002 | 0.000385 | control                                     |          | 0.139937 | 0.988357 | 0.999728 | control                                     |          | 0.000423 | 0.000855 | 0.001672 |
| gel                                         | 0.000169 |          | 0.001491 | 0.667385 | gel                                         | 0.139937 |          | 0.003615 | 0.110984 | gel                                         | 0.000423 |          | 0.997986 | 0.943240 |
| paste                                       | 0.001002 | 0.001491 |          | 0.400421 | paste                                       | 0.988357 | 0.003615 |          | 0.996891 | paste                                       | 0.000855 | 0.997986 |          | 0.916860 |
| foam                                        | 0.000385 | 0.667385 | 0.400421 |          | foam                                        | 0.999728 | 0.110984 | 0.996891 |          | foam                                        | 0.001672 | 0.943240 | 0.916860 |          |

  

| HMOX1 1:10 24 h                             |          |          |          |          | GPX1 1:10 24 h                              |          |          |          |          |  |  |  |  |  |
|---------------------------------------------|----------|----------|----------|----------|---------------------------------------------|----------|----------|----------|----------|--|--|--|--|--|
| F(3, 26)=1.3521, p=0.27928                  |          |          |          |          | F(3, 26)=20.451, p=0.00000                  |          |          |          |          |  |  |  |  |  |
| Tukey's HSD test; MS = 0.10598, df = 26.000 |          |          |          |          | Tukey's HSD test; MS = 0.25487, df = 26.000 |          |          |          |          |  |  |  |  |  |
|                                             | control  | gel      | paste    | foam     |                                             | control  | gel      | paste    | foam     |  |  |  |  |  |
| control                                     |          | 0.999991 | 0.629703 | 0.865304 | control                                     |          | 0.000169 | 0.000370 | 0.000945 |  |  |  |  |  |
| gel                                         | 0.999991 |          | 0.269913 | 0.767636 | gel                                         | 0.000169 |          | 0.006149 | 0.253515 |  |  |  |  |  |
| paste                                       | 0.629703 | 0.269913 |          | 0.994048 | paste                                       | 0.000370 | 0.006149 |          | 0.957308 |  |  |  |  |  |
| foam                                        | 0.865304 | 0.767636 | 0.994048 |          | foam                                        | 0.000945 | 0.253515 | 0.957308 |          |  |  |  |  |  |
